# Supplementary material for: Gut markers of bodily self-consciousness in men
Source: PubMed Central journal article supplement — iScience. 2022 Sep 5;25(10):105061. doi: 10.1016/j.isci.2022.105061 (PMC9519469; doi:10.1016/j.isci.2022.105061), 2022-09-05
Supplement: mmc1.pdf [file mmc1.pdf]

**iScience, Volume 25**

**Supplemental information**

**Gut markers of bodily self-consciousness in men**

**Alessandro Monti, Giuseppina Porciello, Maria Serena Panasiti, and Salvatore M. Aglioti**

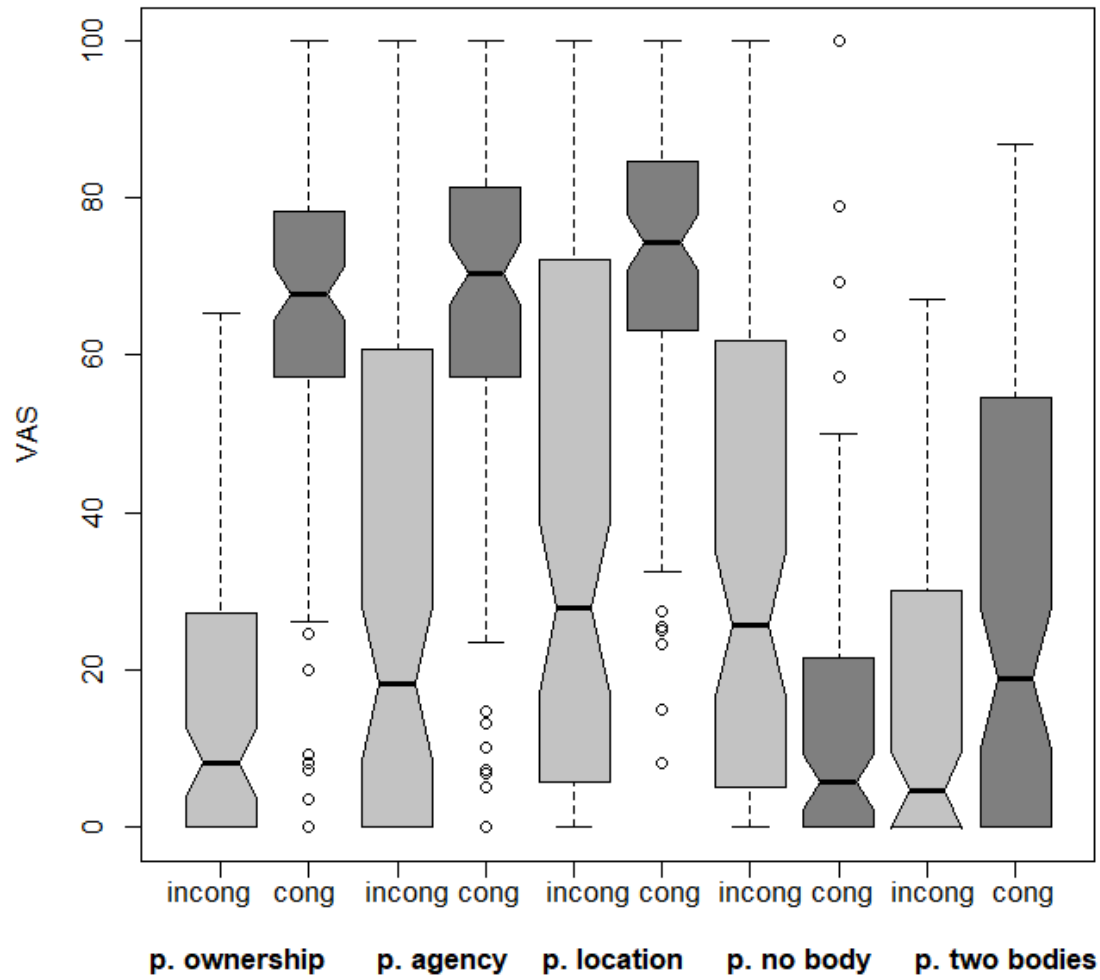

**Figure S1.** Boxplots of the bodily self-consciousness visual analogue scales. 'Incong': incongruent. 'Cong': congruent. Related to STAR Methods.

|                                   | <i>Sum Sq</i> | <i>Mean Sq</i> | <i>NumDF</i> | <i>DenDF</i> | <i>F</i> | <i>p</i>    |
|-----------------------------------|---------------|----------------|--------------|--------------|----------|-------------|
| condition                         | 30123         | 30123          | 1            | 26.58        | 69.4735  | < 0.001 *** |
| item                              | 138897        | 34724          | 4            | 682.05       | 80.0860  | < 0.001 *** |
| region                            | 2500          | 1250           | 2            | 689.12       | 2.8825   | 0.0566674   |
| ph                                | 12            | 12             | 1            | 720.92       | 0.0271   | 0.8693748   |
| pressure                          | 176           | 176            | 1            | 732.28       | 0.4055   | 0.5244588   |
| temperature                       | 233           | 233            | 1            | 178.07       | 0.5365   | 0.4648315   |
| condition:item                    | 104086        | 26022          | 4            | 682.05       | 60.0145  | < 0.001 *** |
| condition:region                  | 440           | 220            | 2            | 689.35       | 0.5079   | 0.6019753   |
| item:region                       | 1609          | 201            | 8            | 682.05       | 0.4639   | 0.8816696   |
| condition:ph                      | 323           | 323            | 1            | 344.98       | 0.7456   | 0.3884859   |
| condition:pressure                | 232           | 232            | 1            | 466.03       | 0.5358   | 0.4645279   |
| condition:temperature             | 42            | 42             | 1            | 43.75        | 0.0976   | 0.7562384   |
| item:ph                           | 4925          | 1231           | 4            | 682.05       | 2.8396   | 0.0235759 * |
| item:pressure                     | 5289          | 1322           | 4            | 682.05       | 3.0497   | 0.0165619 * |
| item:temperature                  | 5241          | 1310           | 4            | 682.05       | 3.0218   | 0.0173608 * |
| region:ph                         | 1123          | 562            | 2            | 729.83       | 1.2954   | 0.2744179   |
| region:pressure                   | 514           | 257            | 2            | 717.05       | 0.5926   | 0.5531316   |
| region:temperature                | 1651          | 826            | 2            | 701.67       | 1.9041   | 0.1497268   |
| condition:item:region             | 780           | 98             | 8            | 682.05       | 0.2250   | 0.9864123   |
| condition:item:ph                 | 336           | 84             | 4            | 682.05       | 0.1936   | 0.9417517   |
| condition:item:pressure           | 1726          | 431            | 4            | 682.05       | 0.9951   | 0.4094523   |
| condition:item:temperature        | 755           | 189            | 4            | 682.05       | 0.4353   | 0.7831263   |
| condition:region:ph               | 150           | 75             | 2            | 483.89       | 0.1732   | 0.8410048   |
| condition:region:pressure         | 1396          | 698            | 2            | 473.00       | 1.6100   | 0.2009734   |
| condition:region:temperature      | 344           | 172            | 2            | 701.36       | 0.3964   | 0.6728689   |
| item:region:ph                    | 11957         | 1495           | 8            | 682.05       | 3.4472   | < 0.001 *** |
| item:region:pressure              | 2255          | 282            | 8            | 682.05       | 0.6502   | 0.7354894   |
| item:region:temperature           | 2145          | 268            | 8            | 682.05       | 0.6185   | 0.7627258   |
| condition:item:region:ph          | 8404          | 1050           | 8            | 682.05       | 2.4228   | 0.0138468 * |
| condition:item:region:pressure    | 1673          | 209            | 8            | 682.05       | 0.4822   | 0.8692024   |
| condition:item:region:temperature | 3431          | 429            | 8            | 682.05       | 0.9892   | 0.4430677   |

**Table S1.** Model 1 type II analysis of variance table with Satterthwaite's method. Blue rows show interactions that were further analysed through post-hoc tests. Significance codes: '\*\*\*' < 0.001 '\*\*' < 0.01 '\*' < 0.05. Related to Figures 4 and 5.

| <i>item</i>       | <i>T.trend</i> | <i>SE</i> | <i>df</i> | <i>t</i> | <i>p</i> |
|-------------------|----------------|-----------|-----------|----------|----------|
| <i>ownership</i>  | -2.26          | 5.94      | 366       | -0.381   | 0.7036   |
| <i>agency</i>     | 3.89           | 5.94      | 366       | 0.654    | 0.5132   |
| <i>location</i>   | -7.72          | 5.94      | 366       | -1.300   | 0.1944   |
| <i>no body</i>    | -13.49         | 5.94      | 366       | -2.272   | 0.0237*  |
| <i>two bodies</i> | 2.72           | 5.94      | 366       | 0.459    | 0.6468   |

**Table S2.** Model 1 post-hoc analysis of the interaction between item and temperature (*T.trend*). Degrees-of-freedom (*df*) method: Kenward-Roger. Related to Figure 4.

| <i>item</i>       | <i>P.trend</i> | <i>SE</i> | <i>df</i> | <i>t</i> | <i>p</i> |
|-------------------|----------------|-----------|-----------|----------|----------|
| <i>ownership</i>  | 0.0829         | 2.25      | 710       | 0.037    | 0.9707   |
| <i>agency</i>     | 2.5662         | 2.25      | 710       | 1.139    | 0.2552   |
| <i>location</i>   | 5.6242         | 2.25      | 710       | 2.496    | 0.0128*  |
| <i>no body</i>    | -0.4251        | 2.25      | 710       | -0.189   | 0.8504   |
| <i>two bodies</i> | 0.3640         | 2.25      | 710       | 0.161    | 0.8718   |

**Table S3.** Model 1 post-hoc analysis of the interaction between item and pressure (*P.trend*). Degrees-of-freedom (*df*) method: Kenward-Roger. Symbols and abbreviations as in Table S2. Related to Figure 4.

| <i>condition</i>   | <i>item</i>       | <i>region</i>      | <i>ph.trend</i> | <i>SE</i> | <i>df</i> | <i>t</i> | <i>p</i>   |
|--------------------|-------------------|--------------------|-----------------|-----------|-----------|----------|------------|
| <i>incongruent</i> | <i>ownership</i>  | <i>stomach</i>     | -0.899          | 6.32      | 705       | -0.142   | 0.8869     |
| <i>congruent</i>   | <i>ownership</i>  | <i>stomach</i>     | 2.098           | 5.36      | 707       | 0.391    | 0.6959     |
| <i>incongruent</i> | <i>agency</i>     | <i>stomach</i>     | -10.605         | 6.32      | 705       | -1.678   | 0.0937     |
| <i>congruent</i>   | <i>agency</i>     | <i>stomach</i>     | -1.189          | 5.36      | 707       | -0.222   | 0.8246     |
| <i>incongruent</i> | <i>location</i>   | <i>stomach</i>     | 21.017          | 6.32      | 705       | 3.326    | < 0.001*** |
| <i>congruent</i>   | <i>location</i>   | <i>stomach</i>     | 4.700           | 5.36      | 707       | 0.876    | 0.3813     |
| <i>incongruent</i> | <i>nobody</i>     | <i>stomach</i>     | -13.201         | 6.32      | 705       | -2.089   | 0.0370*    |
| <i>congruent</i>   | <i>nobody</i>     | <i>stomach</i>     | -11.393         | 5.36      | 707       | -2.124   | 0.0340*    |
| <i>incongruent</i> | <i>two bodies</i> | <i>stomach</i>     | -6.113          | 6.32      | 705       | -0.967   | 0.3337     |
| <i>congruent</i>   | <i>two bodies</i> | <i>stomach</i>     | -0.259          | 5.36      | 707       | -0.048   | 0.9615     |
| <i>incongruent</i> | <i>ownership</i>  | <i>small bowel</i> | 16.027          | 9.52      | 705       | 1.684    | 0.0926     |
| <i>congruent</i>   | <i>ownership</i>  | <i>small bowel</i> | 8.706           | 9.41      | 707       | 0.925    | 0.3554     |
| <i>incongruent</i> | <i>agency</i>     | <i>small bowel</i> | 24.215          | 9.52      | 705       | 2.545    | 0.0111*    |
| <i>congruent</i>   | <i>agency</i>     | <i>small bowel</i> | 12.209          | 9.41      | 707       | 1.297    | 0.1950     |
| <i>incongruent</i> | <i>location</i>   | <i>small bowel</i> | -8.017          | 9.52      | 705       | -0.842   | 0.3998     |
| <i>congruent</i>   | <i>location</i>   | <i>small bowel</i> | -0.110          | 9.41      | 707       | -0.012   | 0.9907     |
| <i>incongruent</i> | <i>nobody</i>     | <i>small bowel</i> | -24.996         | 9.52      | 705       | -2.627   | 0.0088**   |
| <i>congruent</i>   | <i>nobody</i>     | <i>small bowel</i> | 3.646           | 9.41      | 707       | 0.387    | 0.6987     |
| <i>incongruent</i> | <i>two bodies</i> | <i>small bowel</i> | 10.315          | 9.52      | 705       | 1.084    | 0.2787     |
| <i>congruent</i>   | <i>two bodies</i> | <i>small bowel</i> | 6.815           | 9.41      | 707       | 0.724    | 0.4693     |
| <i>incongruent</i> | <i>ownership</i>  | <i>large bowel</i> | 1.102           | 6.56      | 707       | 0.168    | 0.8666     |
| <i>congruent</i>   | <i>ownership</i>  | <i>large bowel</i> | 9.325           | 6.44      | 708       | 1.448    | 0.1480     |
| <i>incongruent</i> | <i>agency</i>     | <i>large bowel</i> | 1.368           | 6.56      | 707       | 0.209    | 0.8348     |
| <i>congruent</i>   | <i>agency</i>     | <i>large bowel</i> | 7.540           | 6.44      | 708       | 1.171    | 0.2420     |
| <i>incongruent</i> | <i>location</i>   | <i>large bowel</i> | -15.444         | 6.56      | 707       | -2.355   | 0.0188*    |
| <i>congruent</i>   | <i>location</i>   | <i>large bowel</i> | 5.818           | 6.44      | 708       | 0.904    | 0.3665     |
| <i>incongruent</i> | <i>nobody</i>     | <i>large bowel</i> | 4.836           | 6.56      | 707       | 0.737    | 0.4611     |
| <i>congruent</i>   | <i>nobody</i>     | <i>large bowel</i> | -0.322          | 6.44      | 708       | -0.050   | 0.9602     |
| <i>incongruent</i> | <i>two bodies</i> | <i>large bowel</i> | -1.075          | 6.56      | 707       | -0.164   | 0.8698     |
| <i>congruent</i>   | <i>two bodies</i> | <i>large bowel</i> | -10.558         | 6.44      | 708       | -1.640   | 0.1015     |

**Table S4.** Model 1 post-hoc analysis of the interaction between condition, item, region, and pH (*ph.trend*). Symbols and abbreviations as in Table S2. Degrees-of-freedom (*df*) method: Kenward-Roger. Related to Figures 4 and 5.

|                         | <i>Sum Sq</i> | <i>Mean Sq</i> | <i>NumDF</i> | <i>DenDF</i> | <i>F</i> | <i>p</i>    |
|-------------------------|---------------|----------------|--------------|--------------|----------|-------------|
| condition               | 33017         | 33017          | 1            | 228.72       | 67.7224  | < 0.001 *** |
| item                    | 33277         | 8319           | 4            | 213.57       | 17.0637  | < 0.001 *** |
| EGG peak                | 1303          | 1303           | 1            | 172.15       | 2.6719   | 0.10396     |
| condition:item          | 30907         | 7727           | 4            | 213.57       | 15.8484  | < 0.001 *** |
| condition:EGG peak      | 2246          | 2246           | 1            | 182.29       | 4.6064   | 0.03317 *   |
| item:EGG peak           | 1270          | 318            | 4            | 213.57       | 0.6515   | 0.62645     |
| condition:item:EGG peak | 880           | 220            | 4            | 213.57       | 0.4512   | 0.77142     |

**Table S5.** Model 2 type II analysis of variance table with Satterthwaite's method. The blue row shows the interaction that was further analyzed through post-hoc tests. Significance codes as in table S1. Related to Figure 5.

| <i>condition</i>   | <i>EGG.trend</i> | <i>SE</i> | <i>df</i> | <i>t</i> | <i>p</i> |
|--------------------|------------------|-----------|-----------|----------|----------|
| <i>incongruent</i> | -293             | 463       | 190       | -0.634   | 0.5268   |
| <i>congruent</i>   | 972              | 384       | 161       | 2.534    | 0.0122*  |

**Table S6.** Model 2 post-hoc analysis of the interaction between condition and EGG peak frequency (*EGG.trend*). Symbols and abbreviations as in Table S2. Degrees-of-freedom (*df*) method: Kenward-Roger. Related to Figure 5.

|             | <i>interoception scores</i> |                 |                  |
|-------------|-----------------------------|-----------------|------------------|
|             | <i>sensibility</i>          | <i>accuracy</i> | <i>awareness</i> |
| <i>N</i>    | 27                          | 31              | 31               |
| <i>mean</i> | 2.534                       | 0.669           | 50.124           |
| <i>SD</i>   | 0.945                       | 0.202           | 23.869           |
| <i>min</i>  | 0.800                       | 0.140           | 0                |
| <i>max</i>  | 4.390                       | 0.963           | 90.909           |

**Table S7.** Descriptive statistics of interoceptive sensibility (scale: 0-5), accuracy (scale: 0-1), and awareness (scale: 0-100). Related to STAR Methods.
